# Supplementary material for: Integration of transcriptomics and metabolomics to reveal the effect of ginsenoside Rg3 on allergic rhinitis in mice
Source: Royal Society of Chemistry journal article supplement (doi:10.1039/d2fo03885d), 2023-01-01
Supplement: d2fo03885d1.pdf [file d2fo03885d1.pdf]

**Table. S1** Primers used for quantitative real-time PCR

| <b>Gene</b>    | <b>Forward primer</b>           | <b>Reverse primer</b>          |
|----------------|---------------------------------|--------------------------------|
| COL1A1         | 5'-GTGCTCCTGGTATTGCTGGT-3'      | 5'-GGCTCCTCGTTTTCTTCTT-3'      |
| COL1A2         | 5'-GACACTGGCAACACTGGTAGAGATG-3' | 5'-CTCCATCACCACGACTTCCAACAG-3' |
| COL3A1         | 5'-GGGTTTCCCTGGTCCTAAAG-3'      | 5'-CCTGGTTTCCCATT TCTCC-3'     |
| CSN3           | 5'-CTACCACTACAGGCCATCTTTG-3'    | 5'-ATGGCGGTGTTATCCTGATTT-3'    |
| CYP26B1        | 5'-TCGAGCTTGATGGTTTCCAGA-3'     | 5'-TGCTATACATGACACTCCAGCCTT-3' |
| DNASE1         | 5'-AGAGAGCCAGCCATTGTTAAG-3'     | 5'-CTTCCTCACCAGAAGCAGTATG-3'   |
| HMOX1          | 5'-AAGCCGAGAATGCTGAGTTCA-3'     | 5'-GCCGTGTAGATATGGTACAAG-3'    |
| KLF15          | 5'-ACACCAAGAGCAGCCACCTCAA-3'    | 5'-GCCTTGACAACCTCATCTGAGCG-3'  |
| LCN2           | 5'-GGCCTCAAGGACGACAACA-3'       | 5'-CCACCCATT CAGTTGTCAAT-3'    |
| PIM3           | 5'-CACTGACTTTGATGGCACCC-3'      | 5'-ATGCCCAGACGAAGACCAG-3'      |
| PIP            | 5'-CACTATGCAGGGTCTCTCATTC-3'    | 5'-GGCACCCTGCCATATCATT A-3'    |
| S100A8         | 5'-TGCCCTCTACAAGAATGACT-3'      | 5'-AAGCTCTGCTACTCCTTGTG-3'     |
| $\beta$ -actin | 5'-CATTGCTGACAGGATGCAGAAGG-3'   | 5'-TGCTGGAAGGTGGACAGTGAGG-3'   |
